# Supplementary material
Source: publisher figshare collection journal article supplement (https://gsajournals.figshare.com/ndownloader/files/28435197)
Supplement: Supplementary file 1 [file 28435197]

## Sheet: Sheet1
Project accession	Tissue or lifestage	Source animals(gender, life stage, tissue)	Read pairs	Overall alignment rate (%)	0 align 0 times	% unaligned	align once	% aligned once	>1 align	% aligned >1 time	pairs not aligning	aligned discordantly one time	mates aligned 0 times concordantly or discordantly	aligned 0 times	aligned exactly 1 time	aligned >1 times
PRJNA733202	Hemocytes	Females, Adult	40814713	90.95	5697734	13.96	23613305	57.85	11503674	28.19	5697734	482882	10429704	7391151	2348099	690454
PRJNA733202	Eyestalk	Females, Adult	38277138	86.23	7433324	19.42	22529685	58.86	8314129	21.72	7433324	250279	14366090	10539810	3202991	623289
PRJNA733202	Midgut	Males, Juveniles	46833447	91.29	6338662	13.53	27753535	59.26	12741250	27.21	6100229	238433	12200458	8156246	3277541	766671
PRJNA701676	Y organ	Males, Adult	33908456	87.34	5893957	17.38	20338062	59.98	7676437	22.64	5893957	185095	11417724	8582775	2294034	540915
PRJNA733202	Adrenergic gland	Males, Adult	38339578	87.1	7050635	18.39	25447147	66.37	5841796	15.24	7050635	232362	13636546	9891841	3132688	612017
PRJNA733202	Hepatopancreas	Males, Adult	37769584	86.34	7845331	20.77	26445785	70.02	3478468	9.21	7845331	556354	14577954	10318607	3709741	549606
PRJNA733202	Brain	Females, Adult	12117320	89.81	1942773	16.03	6935867	57.24	3238680	26.73	1942773	268380	3348786	2469351	691331	188104
PRJNA733202	Thoracic Ganglia Complex	Females, Adult	16419731	89.48	2611802	15.91	9059097	55.17	4748832	28.92	2611802	342015	4539574	3455473	859061	225040
PRJNA733202	Zoea stage 3	Larve	11508542	93.57	1227290	10.66	4415592	38.37	5865660	50.97	1227290	175801	2102978	1479507	432007	191464
PRJNA733202	Zoea stage 5	Larva	11205509	92.32	1434964	12.81	5069344	45.24	4701201	41.95	1434964	203211	2463506	1722076	524232	217198
PRJNA733202	Megalopae	Postlarvae	10517427	91	1582511	15.05	5704497	54.24	3230419	30.71	1582511	251158	2662706	1893732	585071	183903
PRJNA733202	Crab stages 2 and 3	Young juveniles	10839398	88.06	1927655	17.78	5227733	48.23	3684010	33.99	1927655	231019	3393272	2587856	583794	221622
			308550843	88.9013
